# Supplementary material for: Toxicity of nanomaterials due to photochemical degradation and the release of heavy metal ions
Source: Royal Society of Chemistry journal article supplement (doi:10.1039/d0nr03957h), 2020-01-01
Supplement: d0nr03957h1.pdf [file d0nr03957h1.pdf]

## Supporting Information

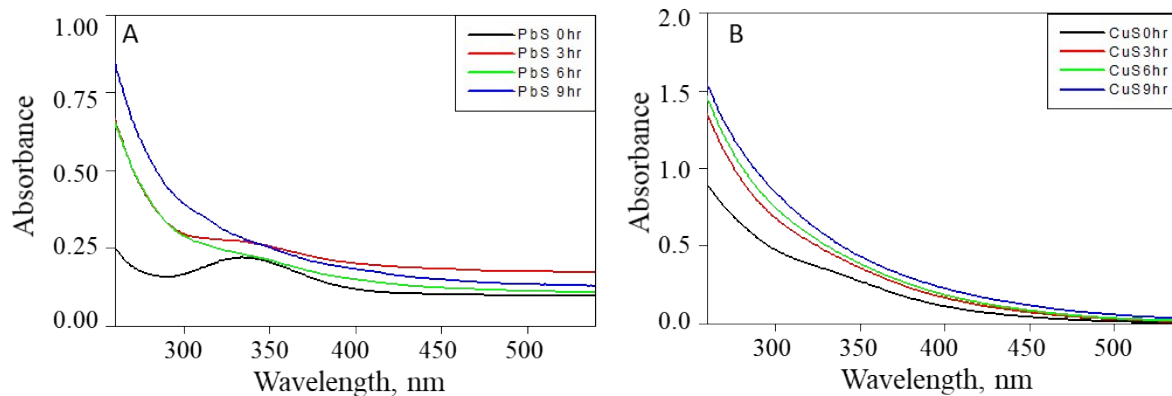

**Figure S1.** UV-Vis absorption spectra of (A) PbS and (B) CuS quantum dots before and after irradiation with the solar simulated UV light. Here the absorption bands below 550 nm (not the band edge) are shown, which show a gradual increase in the absorbencies with time under photoirradiation. This increase in the absorbencies is due to photoinduced degradation of surface ligands and aggregation of the quantum dots.
